# Supplementary material for: Androgen production, uptake, and conversion (APUC) genes define prostate cancer patients with distinct clinical outcomes
Source: JCI journal article supplement (doi:10.1172/jci.insight.183158), 2024-08-29
Supplement: sd1 [file 1]

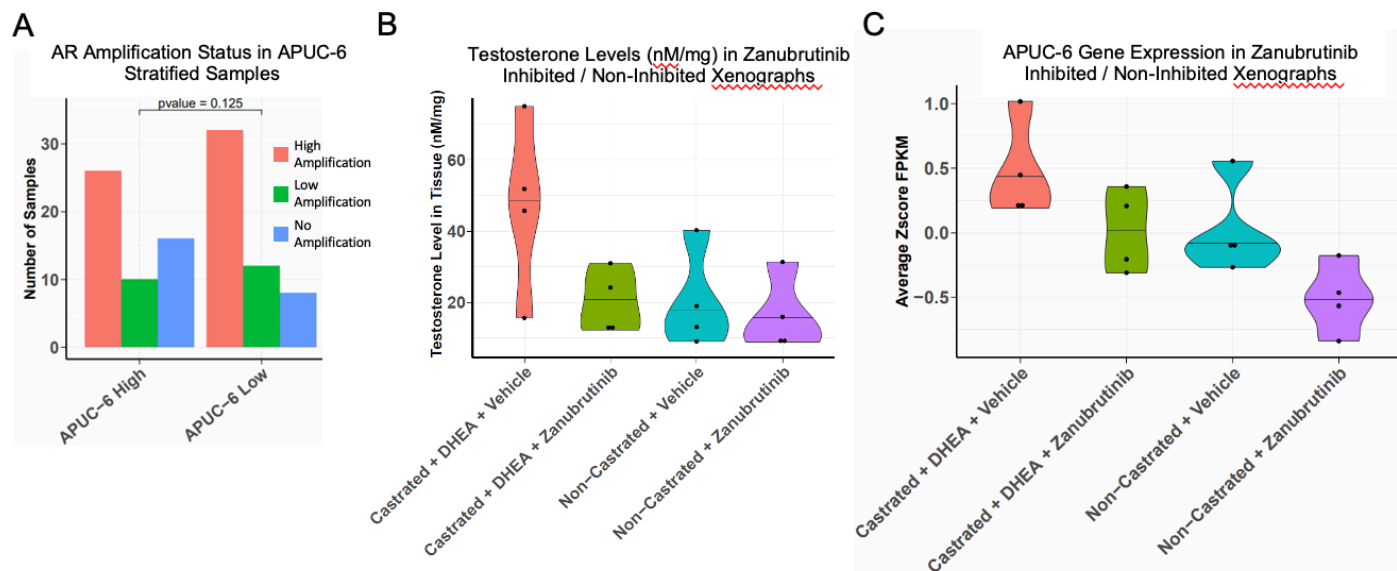

**Supplemental Figure 1.** (A) AR amplification status (no/low/high amplifications) was examined based on metastatic tumors as stratified by APUC-6 high and low status. Wilcoxon tests was applied to determine if there is a significant difference between the two groups. (B and C) The testosterone levels and RNA-seq data were collected from tumors formed from C4-2 xenografts from our prior study Li et al. 2023. The testosterone levels (B) and the average APUC-6 gene expression (C) is shown based on the 4 replicates in each experimental arm.

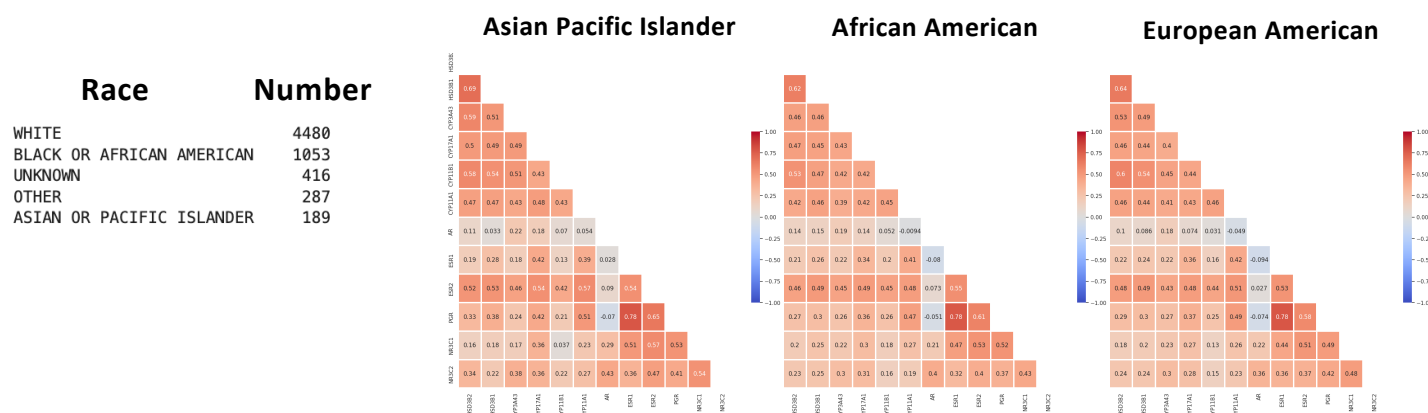

**Supplemental Figure 2.** Based on WTS from the Caris database, we examined the Spearman correlation between APUC-6 genes, AR, ESR1, ESR2, PGR, GR (NR3C1), and MR (NR3C2) based on biopsy sites. The number of samples are indicated based on self-reported race.

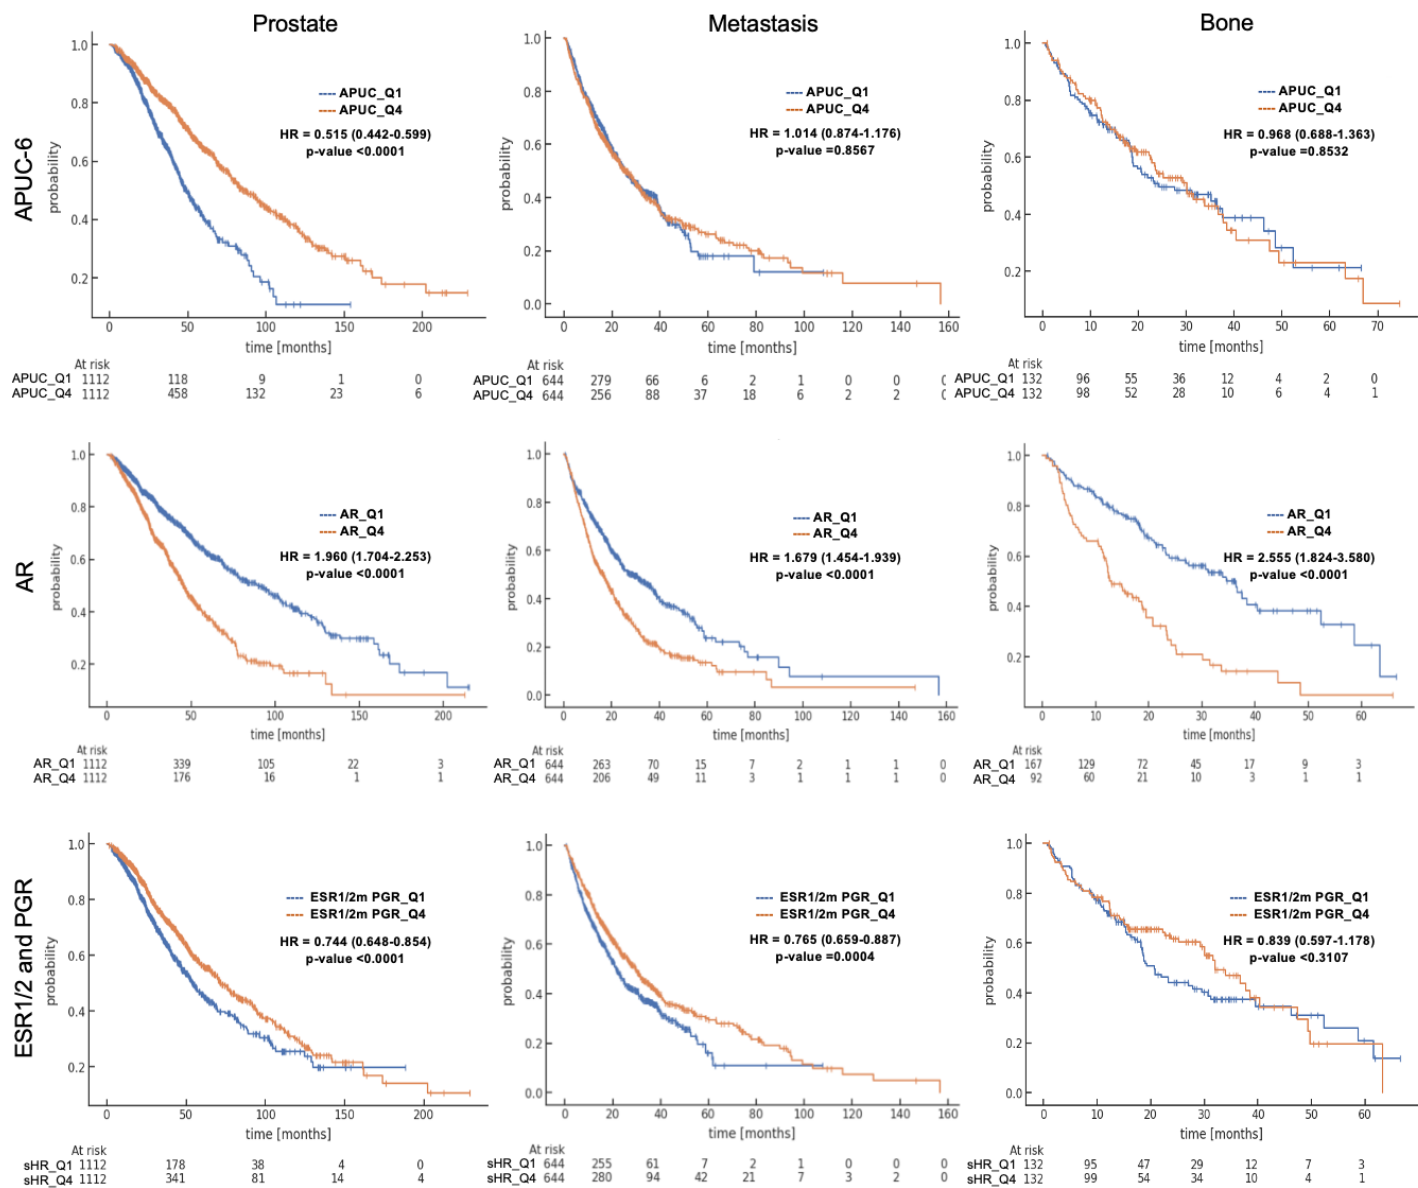

**Supplemental Figure 3.** Caris samples were stratified based on the aggregate expression of APUC-6, AR, or alternative hormone receptors (ESR1, ESR2, and PGR). Kaplan-Meier analysis was used to depict the effects on OS between each of the gene sets as compared to the control group.

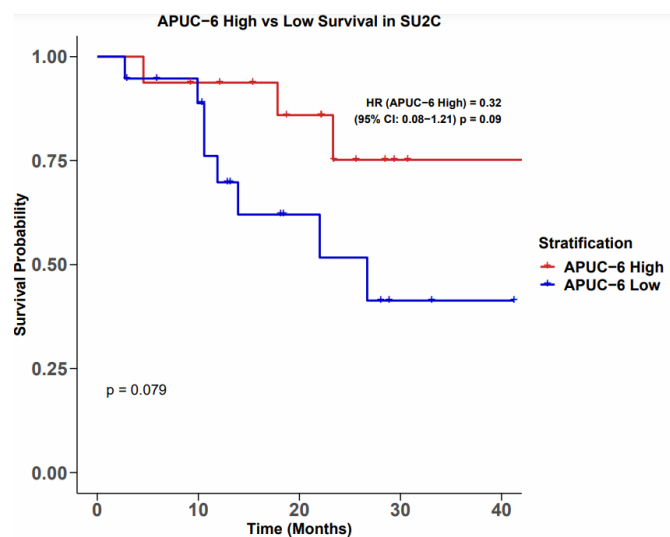

|             | Number of Samples | Number of Events | Median Survival Time | 95% CI (Lower) | 95% CI (Upper) |
|-------------|-------------------|------------------|----------------------|----------------|----------------|
| APUC-6 High | 16                | 3                | NA                   | NA             | NA             |
| APUC-6 Low  | 19                | 8                | 26.7                 | 13.9           | NA             |

**Supplemental Figure 4.** Of the metastatic PC samples from Abida et al. 2019, we stratified patients by APUC-6 expression high and low. The samples with available survival data were subsequently analyzed through Kaplan Meier curves.

|                 | No treatment | ADT   | Differential Score |
|-----------------|--------------|-------|--------------------|
| <i>HSD3B2</i>   | 1.35         | 1.29  | -0.06              |
| <i>HSD3B1</i>   | -0.94        | 3.03  | 3.96               |
| <i>CYP3A43</i>  | 0.00         | 0.36  | 0.36               |
| <i>CYP17A1</i>  | -0.72        | 0.62  | 1.34               |
| <i>CYP11B1</i>  | -1.25        | -0.34 | 0.90               |
| <i>CYP11A1</i>  | -0.77        | -0.46 | 0.31               |
| <i>CYP17A1</i>  | -0.72        | 0.62  | 1.34               |
| AVERAGE, APUC-6 | -0.43        | 0.73  | 1.16               |
| GLOBAL AVERAGE  | 0.00         | 0.06  | 0.06               |

**Supplemental Table 1.**
